# Supplementary material for: Grape pomace extract attenuates high fat diet-induced endotoxemia and liver steatosis in mice
Source: Royal Society of Chemistry journal article supplement (doi:10.1039/d4fo06332e), 2025-01-01

## **Supplementary Information**

**“Grape pomace extract attenuates high fat diet-induced endotoxemia and liver steatosis in mice”**

Supplementary **Figure 2**: Original Western blotting images presented in the study  
Uncropped blots for Figure 2B

○ **Hepatic TLR4 and corresponding loading control  $\beta$ -actin:**

○ **Ponceau:**

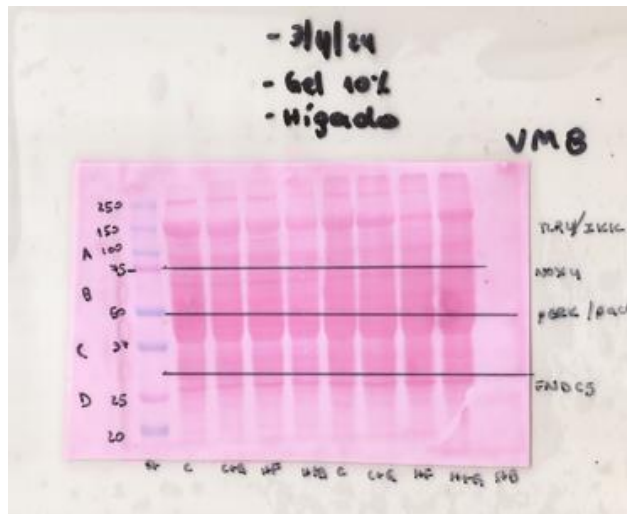

○ **Full Blot  $\beta$ -actin:**

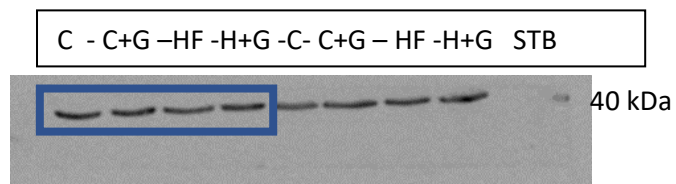

○ **Full Blot TLR4: 95/120 kDa**

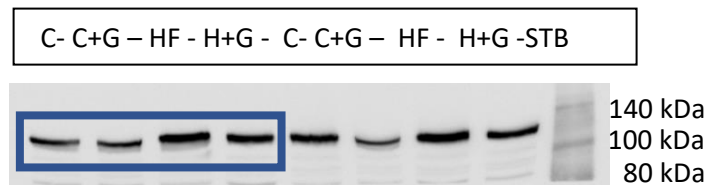

Supplementary **Figure 4**: Original Western blotting images presented in the study  
 Uncropped blots for Figure **4A**

○ **Hepatic p-IKK $\alpha$ / $\beta$  and corresponding total IKK**

○ **Ponceau:**

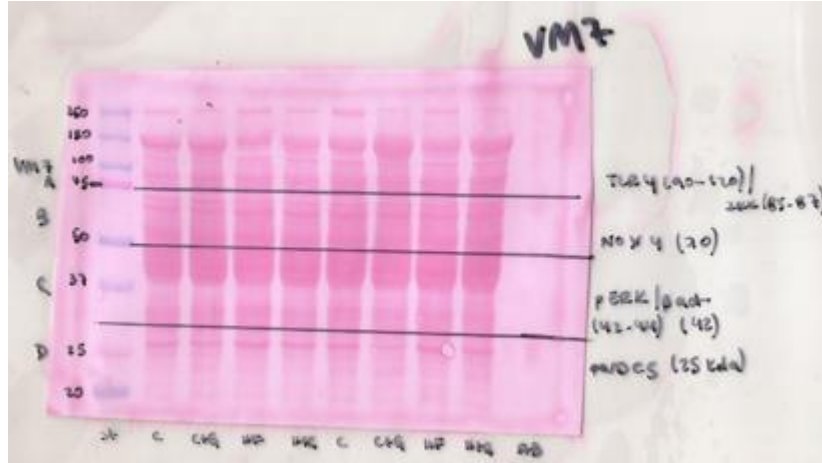

○ **Full blot p-IKK  $\alpha$ / $\beta$ : 85-87 kDa**

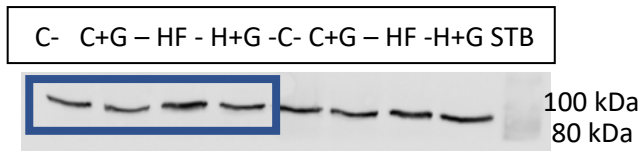

○ **Full blot IKK  $\alpha$ / $\beta$ : 85-87 kDa**

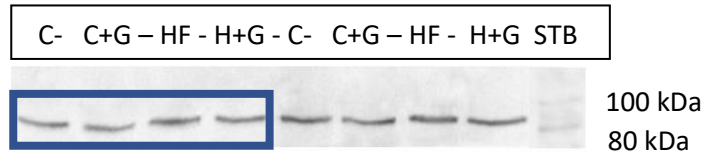

- Hepatic p-p65 and corresponding total p65

- Ponceau:

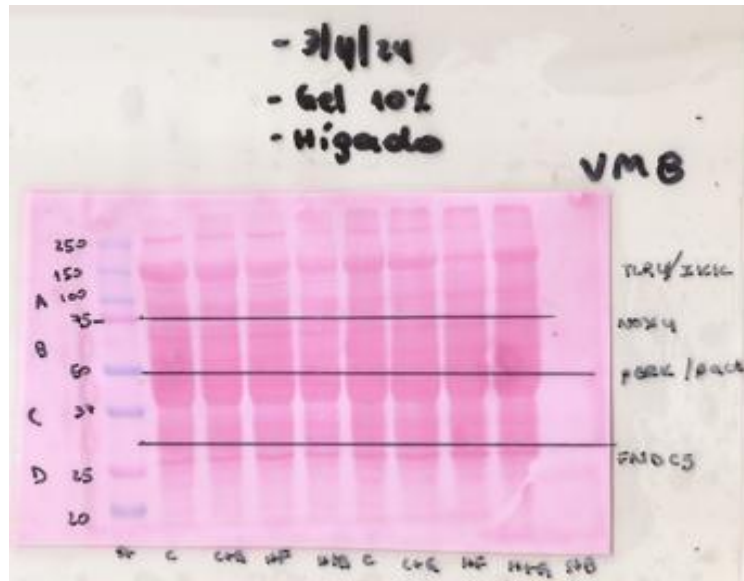

- Full blot p-P65: 65 kDa

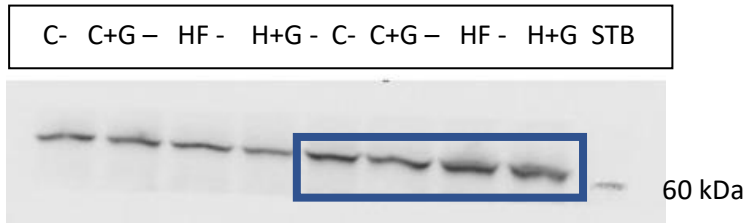

- Full blot P65: 65 kDa

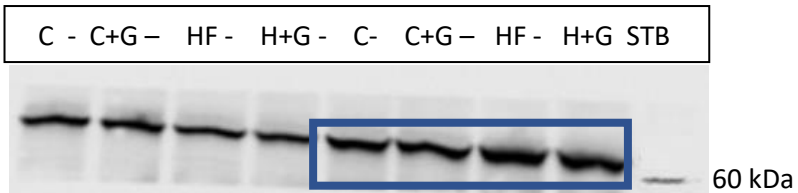

Supplementary **Figure 4**: Original Western blotting images presented in the study  
Uncropped blots for Figure **4B**

○ **Hepatic NOX4 and corresponding loading control  $\beta$ -actin**

○ **Ponceau:**

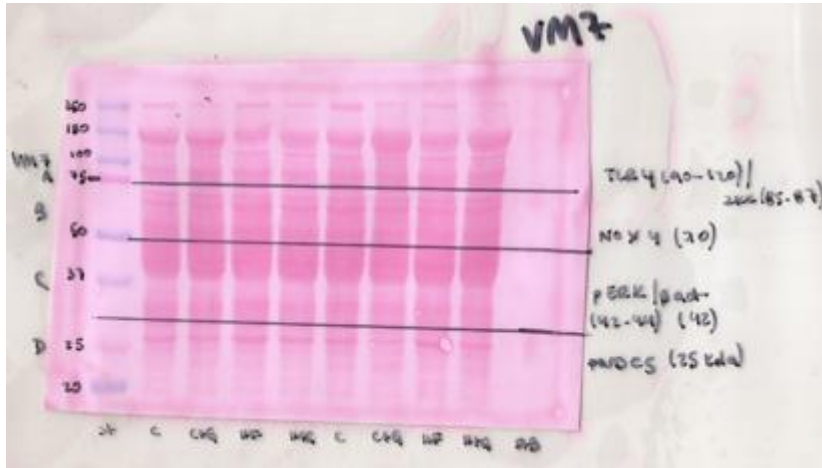

○ **Full Blot  $\beta$ -actin:**

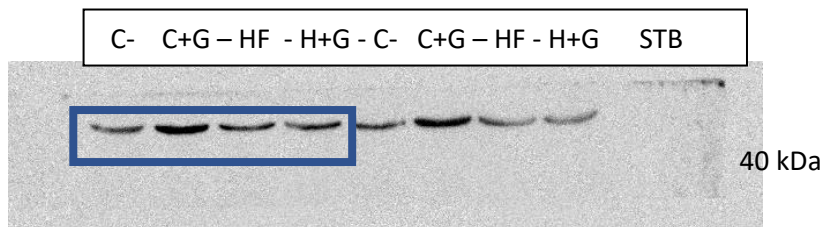

○ **Full Blot NOX4: 70kDa**

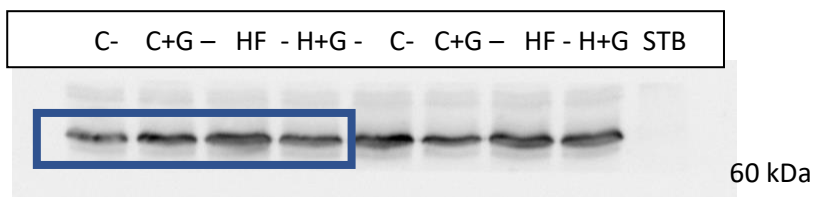

- Hepatic 4-HNE and corresponding loading control  $\beta$ -actin

- Ponceau:

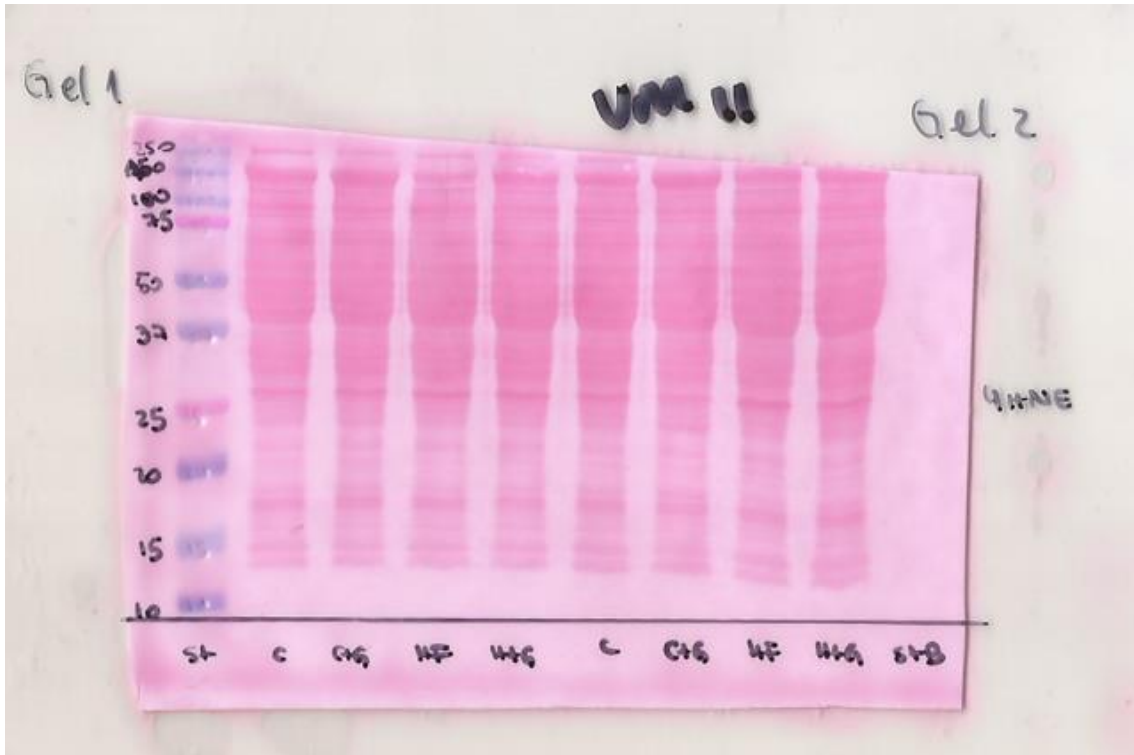

- Full blot  $\beta$ -actin:

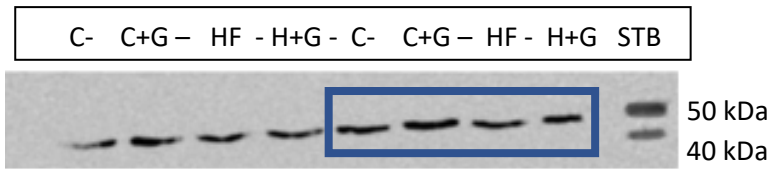

- Full blot 4HNE: 66 kDa

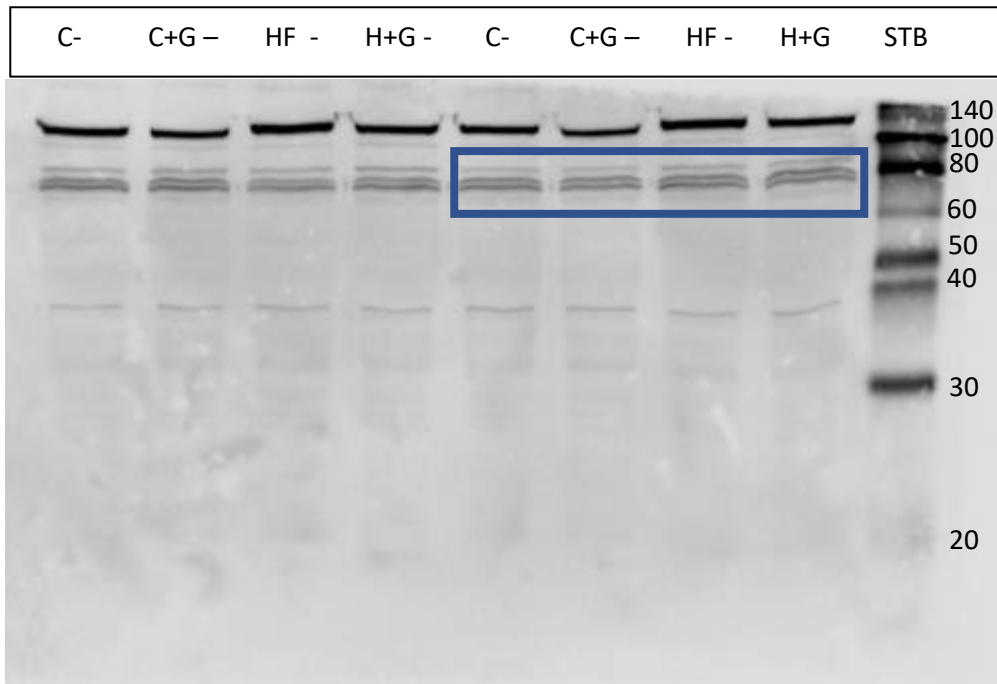

Supplementary **Figure 4**: Original Western blotting images presented in the study  
 Uncropped blots for Figure **4C**

- **Hepatic F4/80 and corresponding loading control  $\beta$ -actin**
  - **Ponceau:**

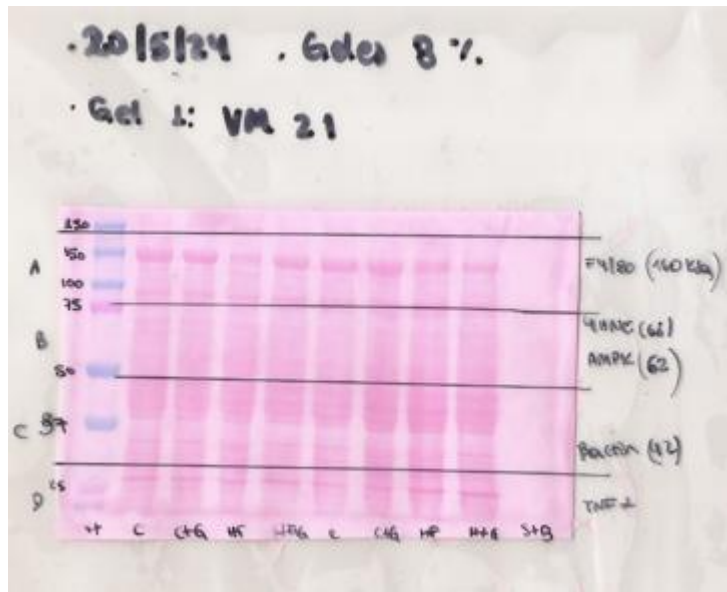

- **Full Blot B-actin:**

C- C+G - HF - H+G - C - C+G - HF - H+G STB

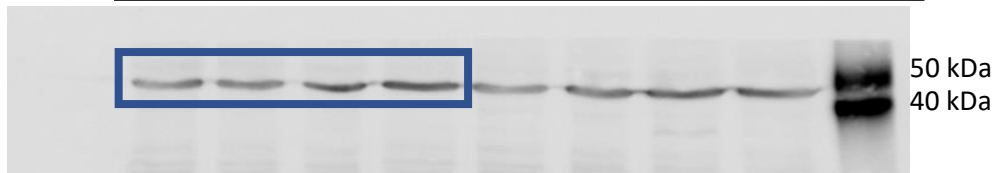

- **Full Blot F4/80: 160 kDa**

C- C+G - HF - H+G - C- C+G - HF - H+G STB

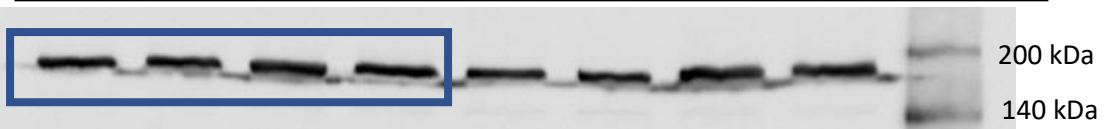

- **Hepatic TNF- $\alpha$  and corresponding loading control  $\beta$ -actin**

- **Ponceau:**

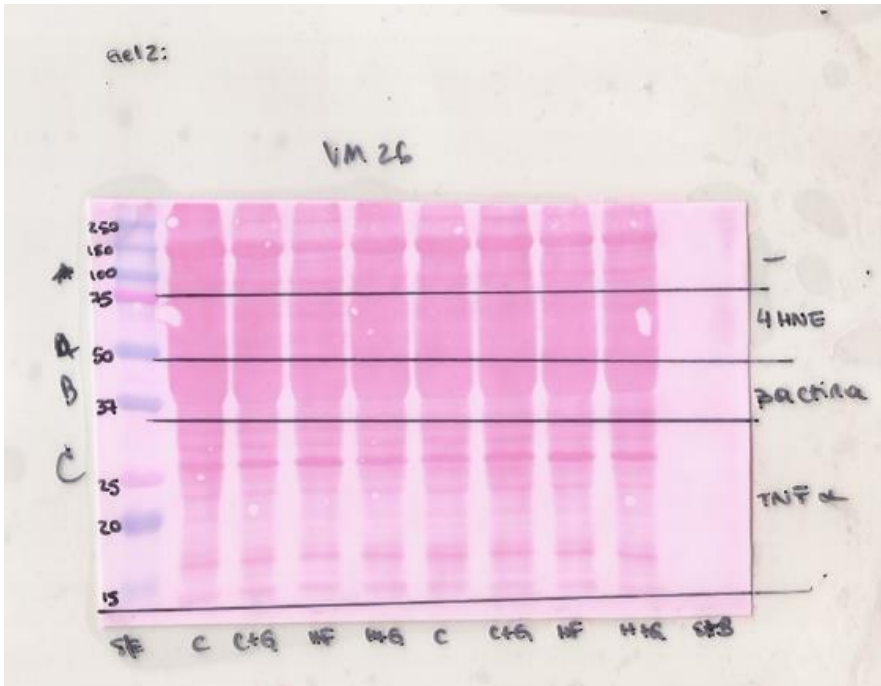

- **Full Blot B-actin:**

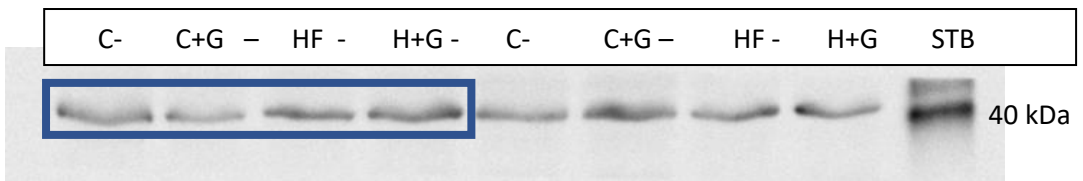

- **Full Blot TNF $\alpha$ : 26 kDa**

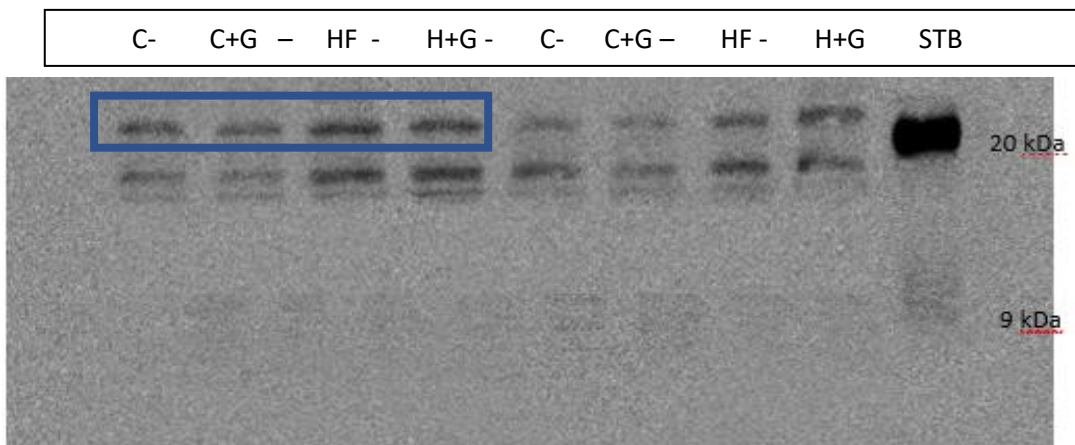



Supplementary **Figure 5**: Original Western blotting images presented in the study.

Uncropped blots for Figure **5C**

- **Caco-2 occludin and corresponding loading control  $\beta$ -actin:**

- **Ponceau:**

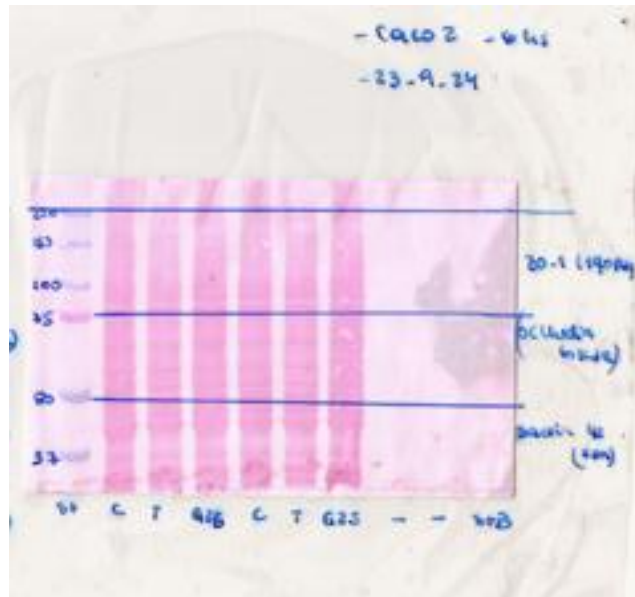

- **Full blot B-actin:**

ST C - T - G25 - C - T - G25 - - - STB

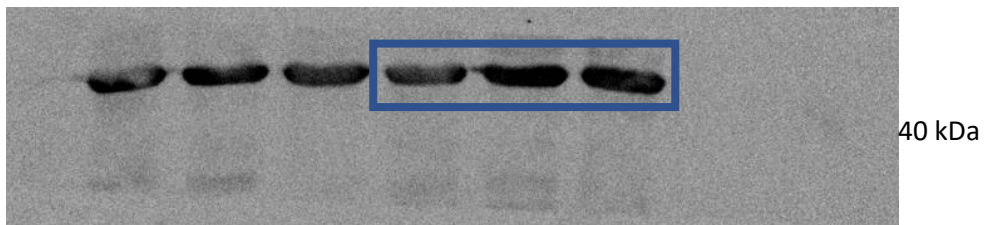

- **Full blot Occludin:** ~ 52 kDa

C - T - G25 - C - T - G25 - - - STB

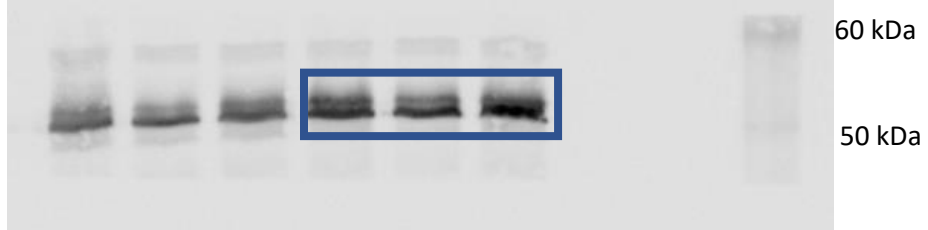

- **Caco-2 ZO-1 and corresponding loading control  $\beta$ -actin:**

- **Ponceau:**

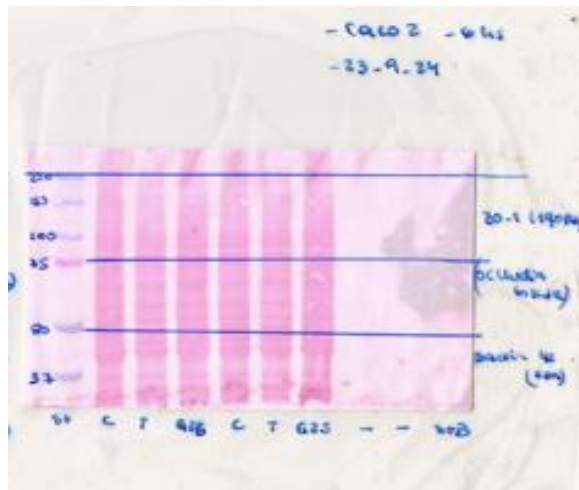

- **Full blot B-actin:**

|   |   |   |   |     |   |   |   |   |   |     |   |   |   |     |
|---|---|---|---|-----|---|---|---|---|---|-----|---|---|---|-----|
| C | - | T | - | G25 | - | C | - | T | - | G25 | - | - | - | STB |
|---|---|---|---|-----|---|---|---|---|---|-----|---|---|---|-----|

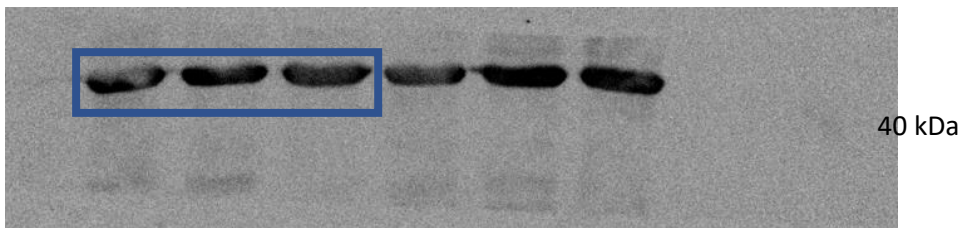

- **Full blot ZO-1: ~225 kDa**

|   |   |   |   |     |   |   |   |   |   |     |   |   |   |     |
|---|---|---|---|-----|---|---|---|---|---|-----|---|---|---|-----|
| C | - | T | - | G25 | - | C | - | T | - | G25 | - | - | - | STB |
|---|---|---|---|-----|---|---|---|---|---|-----|---|---|---|-----|

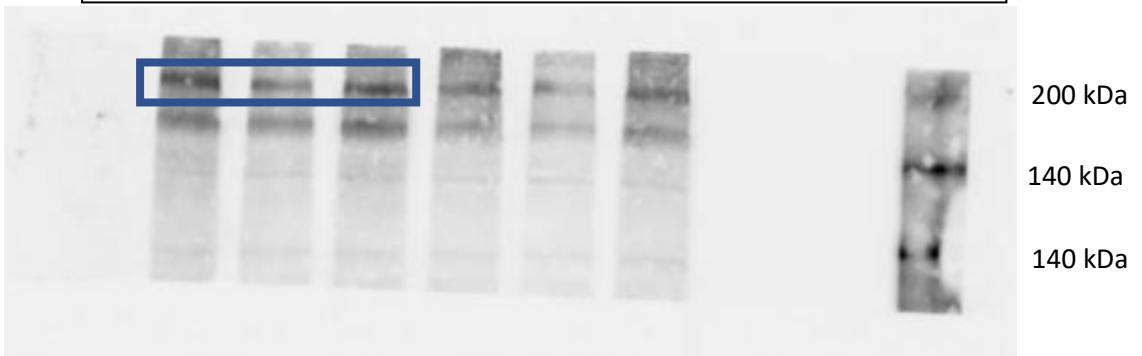

- Caco-2 Claudin and corresponding loading control  $\beta$ -actin:
  - Ponceau:

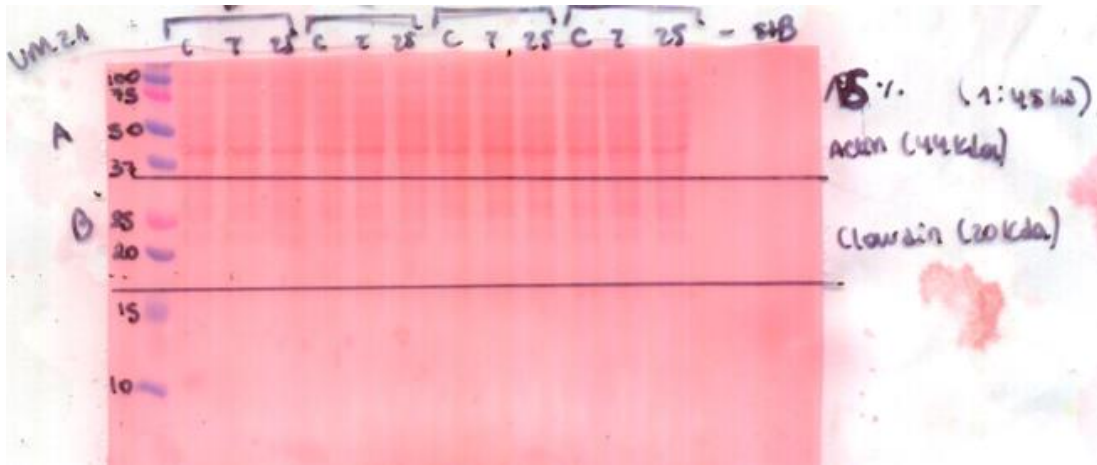

- Full blot B-actin:

ST- C - T - G25- C - T - G25- C - T - G25- C - T - G25 STB

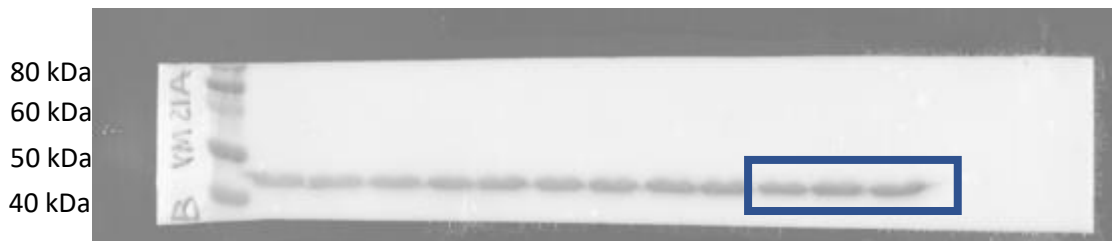

- Full blot Claudin: ~20 kDa

ST- C - T - G25- C - T - G25- C - T - G25- C - T - G25 STB

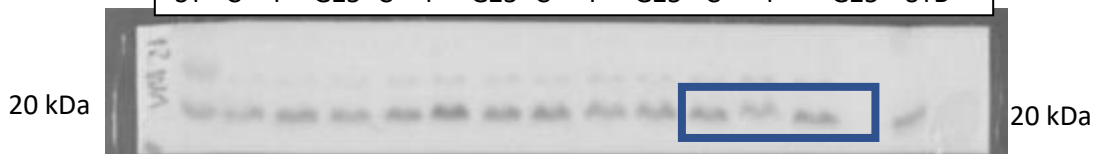

Supplementary **Figure 6**: Original Western blotting images presented in the study.

Uncropped blots for Figure 6C

○ **Caco-2 p-p65 and corresponding loading control p-65:**

○ **Ponceau:**

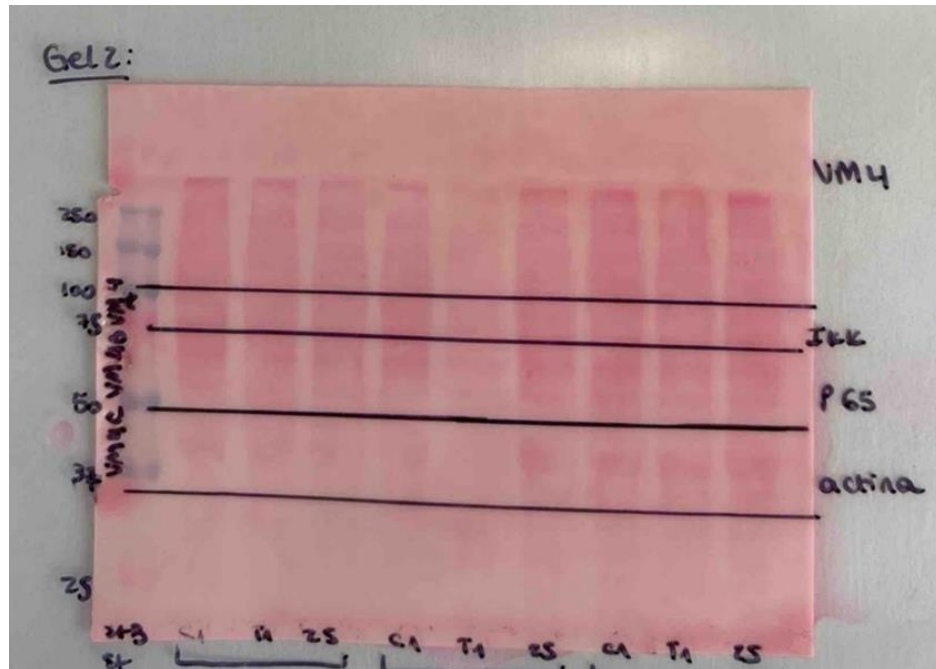

○ **Full blot -pp65:** 65 kDa

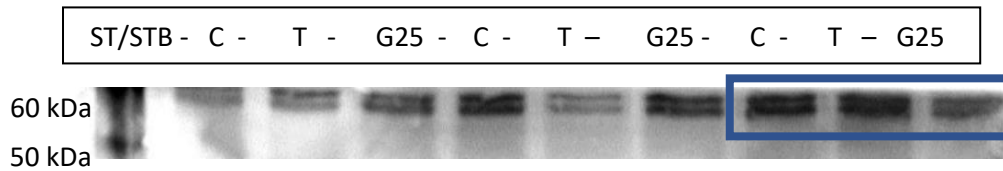

○ **Full blot p65:** 65 kDa

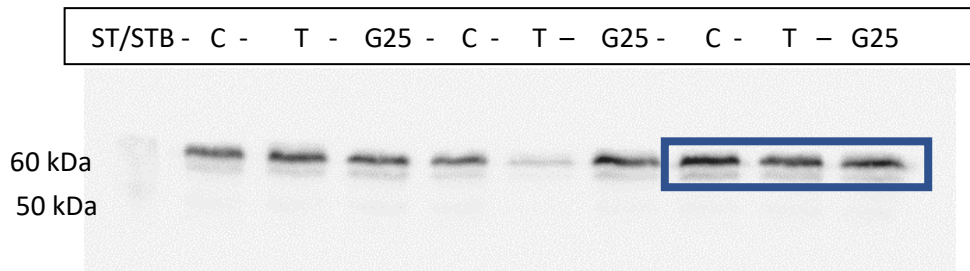

- **Caco-2 p-ERK and corresponding loading control ERK:**

- **Ponceau:**

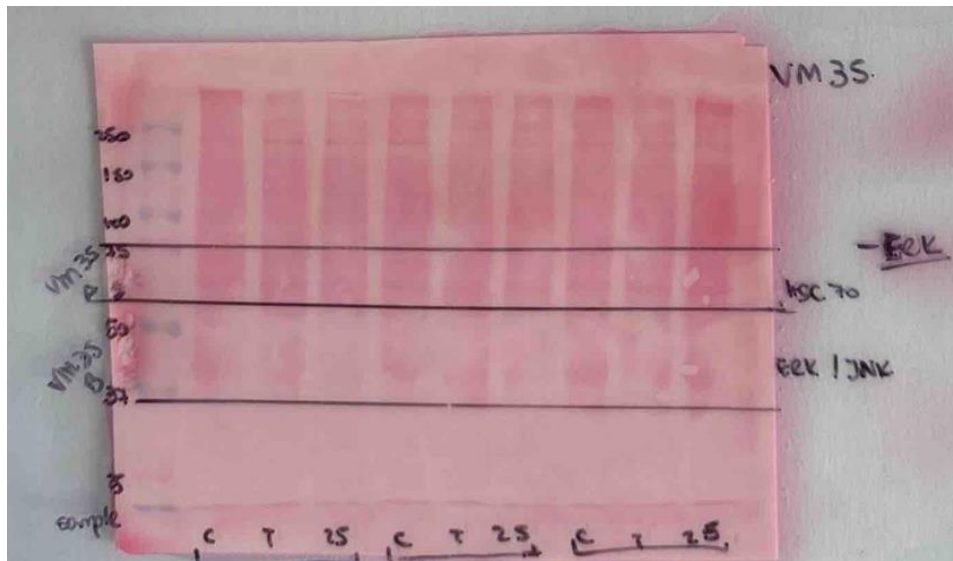

- **Full blot p-ERK: 42-44 kDa**

ST/STB - C - T - G25 - C - T - G25 - C - T - G25

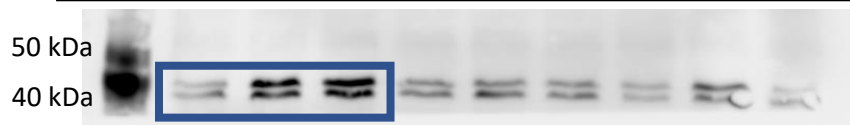

- **Full blot ERK: 42-44 kDa**

ST/STB - C - T - G25 - C - T - G25 - C - T - G25

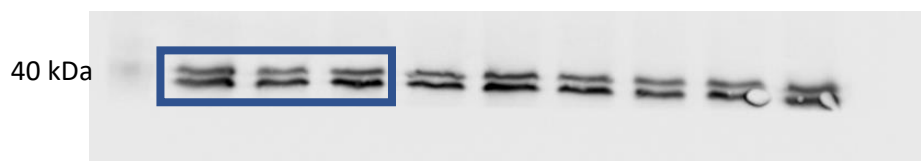

Supplement: d4fo06332e1.pdf [file d4fo06332e1.pdf]
